# Supplementary material
Source: PubMed Central journal article supplement (PMC7604725)
Supplement: supp_RA120001066_162696_1_supp_598397_qgrwzg.pdf [file supp_RA120001066_162696_1_supp_598397_qgrwzg.pdf]

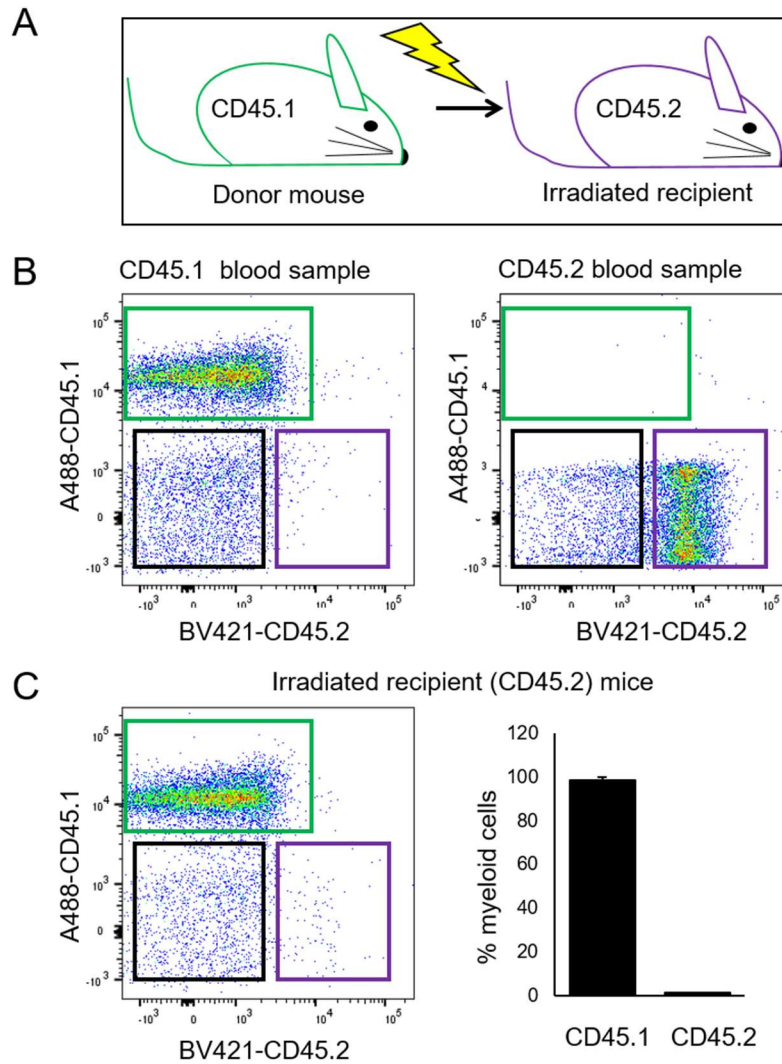

**Supplemental Figure S1.** Evaluation of the bone marrow transplant efficiency. **(A)**

Bone marrow cells obtained from wild-type CD45.1 mice were transplanted into lethally-irradiated CD45.2 recipient mice. **(B)** Blood sample of CD45.1 and CD45.2 mice stained with anti-CD45.1 conjugated to Alexa488 (A488-CD45.1) and anti-CD45.2 conjugated to Brilliant Violet 421 (BV421-CD45.2). **(C)** After an eight week recovery period, we bleed recipient mice to determine bone marrow transplant efficiency by quantifying the amount of CD45.1 and CD45.2 cells (n = 5 mice).

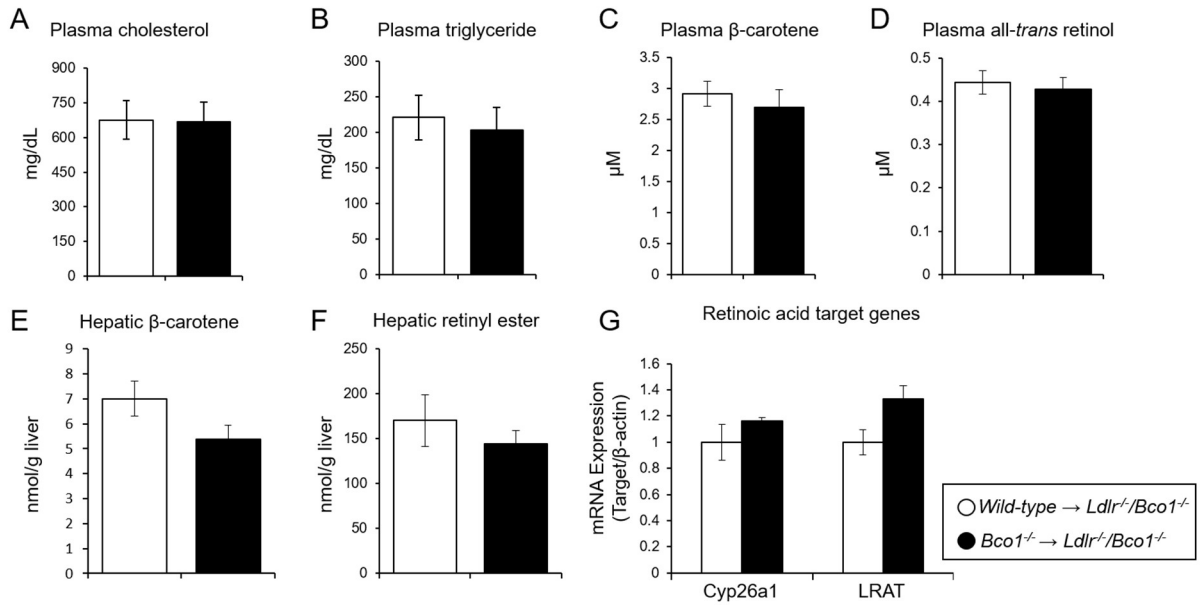

**Supplemental Figure S2.** Wild-type or *Bco1*<sup>-/-</sup> mice bone marrow cells were transplanted into lethally-irradiated *Ldlr*<sup>-/-</sup>/*Bco1*<sup>-/-</sup> mice. After a recovery period, chimeric mice were fed a Western diet supplemented with  $\beta$ -carotene for 16 weeks. **(A)** Total cholesterol, **(B)** triglyceride, **(C)**  $\beta$ -carotene, and **(D)** all-*trans* retinol in plasma at the moment of the sacrifice. **(E)**  $\beta$ -carotene, and **(F)** retinyl esters in liver homogenates. **(G)** Relative mRNA expression of two retinoic acid target genes in liver homogenates. Values are represented as the mean  $\pm$  SEM of 6 to 12 animals per group. Statistical differences were evaluated using a two-tailed Student's t-test.

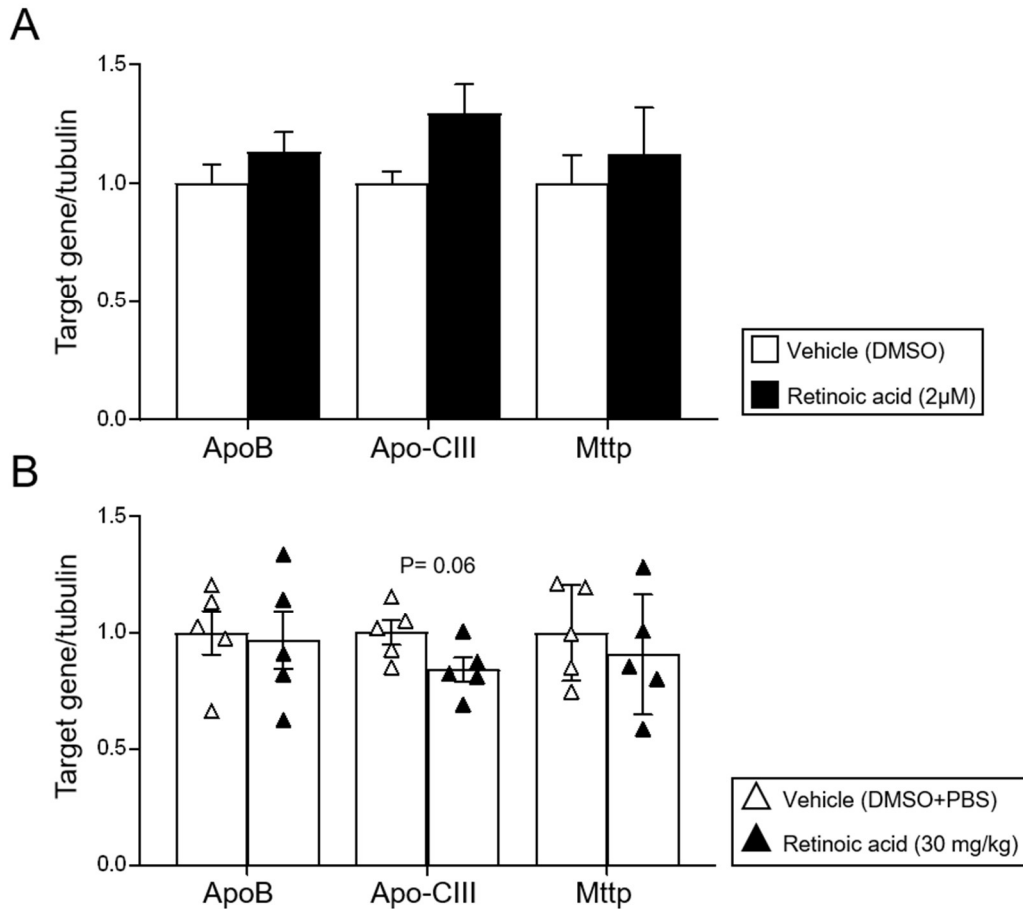

**Supplemental Figure S3.** Effect of retinoic acid on genes related to lipoprotein metabolism. **(A)** Changes on mRNA expression in McA rat hepatic cells cultured in a normal growth medium and exposed to 2 µM of retinoic acid or DMSO (vehicle control) for 6 hours. **(B)** Changes on mRNA expression in age and sex-matched wild-type mice after receiving a single intraperitoneal injection of an emulsion containing 30 mg/kg of retinoic acid dissolved in DMSO and PBS or vehicle (DMSO + PBS) for 6 hours before tissue harvesting. Numerical data represent the mean ± SEM of 3 independent experiments (cell culture) and 5 animals/group. Statistical differences were evaluated by unpaired Student's t-test.

**Supplemental Table S1.** Diet composition used in the animal study<sup>1</sup>.

|                                                   | <b>WD-VAD</b>    | <b>WD-<math>\beta</math>-carotene</b> | <b>WD-VA</b>     |
|---------------------------------------------------|------------------|---------------------------------------|------------------|
| <b>Ingredient</b>                                 | <b>g/kg diet</b> | <b>g/kg diet</b>                      | <b>g/kg diet</b> |
| Casein                                            | 200              | 200                                   | 200              |
| L-Cysteine                                        | 3                | 3                                     | 3                |
| Corn starch                                       | 72.8             | 72.8                                  | 72.8             |
| Maltodextrin                                      | 100              | 100                                   | 100              |
| Sucrose                                           | 212              | 212                                   | 212              |
| Cellulose                                         | 50               | 50                                    | 50               |
| Soybean oil                                       | 25               | 25                                    | 25               |
| Lard                                              | 160              | 160                                   | 160              |
| t-butylhydroquinone                               | 0                | 0                                     | 0                |
| Choline bitartrate                                | 2                | 2                                     | 2                |
| Dicalcium phosphate                               | 13               | 13                                    | 13               |
| Calcium carbonate                                 | 5.5              | 5.5                                   | 5.5              |
| Potassium citrate monohydrate                     | 16.5             | 16.5                                  | 16.5             |
| Cholesterol                                       | 3.08             | 3.08                                  | 3.08             |
| Mineral mix                                       | 10               | 10                                    | 10               |
| Vitamin mix, no added vitamin A                   | 10               | 10                                    | 10               |
| Placebo beadlets                                  | 0.5              | 0                                     | 0.5              |
| $\beta$ -carotene beadlets, 10% $\beta$ -carotene | 0                | 0.5                                   | 0                |
| Retinyl acetate, 500,000 IU/g                     | 0                | 0                                     | 0.0071           |

<sup>1</sup> IU; international units, WD-VAD; Western diet - vitamin A deficient, VA; vitamin A.

**Supplemental Table S2.** Abundance of selected genes in samples isolated from laser capture microdissection in CD68<sup>+</sup> cells collected from atherosclerotic lesions in lethally-irradiated *Ldlr*<sup>-/-</sup>/*Bco1*<sup>-/-</sup> mice that were transplanted with wild-type bone marrow cells (see Methods for details)<sup>1</sup>.

| Absolute Expression Value Organized by Abundance | Gene               | Normalized Counts |
|--------------------------------------------------|--------------------|-------------------|
| 1                                                | <i>ApoE</i>        | 1836852           |
| 2                                                | <i>Spp1</i>        | 1336037           |
| 3                                                | <i>Lyz2</i>        | 800186            |
| 4                                                | <i>Ctsb</i>        | 777222            |
| 5                                                | <i>Ctsl</i>        | 683521            |
| 31                                               | <i>Cd68</i>        | 114771            |
| <b>13963</b>                                     | <b><i>Bco1</i></b> | <b>33</b>         |

<sup>1</sup> Wild-type bone marrow cells were transplanted into lethally-irradiated *Ldlr*<sup>-/-</sup>/*Bco1*<sup>-/-</sup> mice. After a recovery period, chimeric mice were fed a Western diet supplemented with  $\beta$ -carotene for 16 weeks. CD68<sup>+</sup> cells isolated from atherosclerotic lesions were used to perform RNA sequencing analysis.
